# Supplementary material for: Drosophila Importin α1 Performs Paralog-Specific Functions Essential For Gametogenesis
Source: Oxford University Press journal article supplement (doi:10.1534/genetics.107.081778), 2008-02-01
Supplement: genetics.107.081778-1.doc [file genetics.107.081778-1.doc]

**APPENDIX**

Our initial strategy to isolate mutants in the *Drosophila* *importin 1* (*D1*) gene relied on the mobilization of a P element located approximately 6 Kb 5’ to the D1 gene (in *CG8533*; see main text Figure 1). Mobilization was assessed with a mass PCR-based screen of F1 progeny for the presence of a P element located within approximately 2 Kb of the *D1* gene using a strategy similar to that of BALLINGER and BENZER (1989). Over 10,000 chromosomes were screened by this method without success. One explanation for this failure is that imprecise excisions of the *CG8533* P element might have generated deletions of indeterminate size whose genomic boundaries would be difficult to determine with respect to the *D1* gene region, particularly if the mutation generated a lethal condition.

As an alternate strategy, we employed a male recombination scheme. Meiotic recombination does not normally occur in *Drosophila* males, but can be induced via an aberrant transposon mobilization event in animals heterozygous for a P element insertion (Gray *et al.* 1996; Preston and Engels 1996). It had been demonstrated that recombinants recovered from these types of events often display small deletions of genomic regions at the site of the recombination event (Gray *et al.* 1996). We therefore generated male animals that were heterozygous for the *CG8533* w+ P element insertion and a multiply marked third chromosome (*rucuca*) in a white eyed (*w1118*) genetic background that also carried a source of P element transposase (∆2-3; see Figure S1). When these male animals were mated with *w1118*; *rucuca* females, we were able to select progeny that were phenotypically white+, curled, stripe, ebony and generate balanced stocks. Animals with this phenotype are indicative of recombination events occurring toward the *D1* side of the *CG8533* P element insertion and could potentially carry small deletions on that same side (the animals remain white+ because the *CG8533* w+ P element remains at its original location during the recombination event (Gray *et al.* 1996). From among approximately 20,000 progeny examined, we isolated 11 such recombinant lines, 10 of which were retained for subsequent analysis.

**Genomic analysis of *D1* deletions**

Using genomic DNA isolated from each of the male recombinant lines, PCR was performed using a primer from within the P element and a second, complementary strand primer from the positions depicted in text Figure 1. Supplemental Table 1 summarizes these data including the homozygous phenotype associated with each recombinant line and the apparent genomic arrangement of DNA associated with the recombinant as described in the main text.

The relevant results for recombinant lines 1D and 2D are shown in Figure S2 as an example of the analysis. Each of these lines generates nearly identical PCR products when PCR is performed between the P element and primer -4000 or P element and primer -6000. The DNAs generated by the two respective reactions differ in size by approximately 2 Kb due to the positions of the -4000 and -6000 primers (arrows in Figure S2). DNA sequencing of these PCR products confirms that the amplified fragments represent the border of a deletion removing regions between the *CG8533* P element insertion site and including *D1* and *Cyp305a1* (see text). A second fainter band also appears when primer -4000 is used for PCR amplification (arrowheads in Figure S2). DNA sequencing of this product demonstrates that it is unrelated to the *D1* region and originates from the *Drosophila* homolog of the *Huntingtin’s* gene in region 98E of chromosome 3R for which primer -4000 has an exact match in the final 10 bases of its length. This DNA product is also seen when these primers are used in the original *CG8533* P element control strain (data not shown).

**SUPPLEMENTAL TABLE 1**

**Characterization of male recombinant lines**

| **Line Designation** | **Homozygous phenotype** | **PCR amplified region** |
| --- | --- | --- |
| CG8533 | viable and fertile (control) | Type 1 |
| B | viable and fertile |
| ND1 | viable and fertile |
| RI1 | viable and fertile |
| 1D | viable, male and female sterile | Type 2 |
| 2D | viable, male and female sterile |
| RD2 | viable, male and female sterile |
| RD3 | viable, male and female sterile |
| RJ3 | larval lethal |
| NC1 | larval lethal | Type 3 |
| NE1 | larval lethal |

Ten of the 11 independently derived lines recovered from the male recombination scheme are listed in the first column (line RD1 was lost and never characterized). *CG8533* in the first row is the original P element insert line prior to the male recombination event and serves as a control for these lines. Line 1D was renamed *Df(3L)1S1* upon subsequent analysis (see text). The second column describes the phenotype associated with individuals homozygous for the recombinant chromosome. The third column places the individual recombinant chromosomes into groups based on genomic DNA analysis as determined by PCR amplification using a P element primer and primers listed in text figure 1 (see text). Type I animals have PCR amplification patterns indistinguishable from wild type. Type II animals amplify genomic regions including and to the right of primer -4000 but not between the P element primer and -2000. Type III animals do not amplify genomic DNA regions with the P element and any of the primers shown in text Figure 1.

**FIGURE LEGENDS**

**Figure S1. Male recombination scheme.** Males heterozygous for the CG8533 w+ insertion and rucuca ∆2-3 chromosomes undergo transposition of the w+ P element to induce male recombination. These animals were crossed with *w1118; rucuca* females and phenotypically white+, curled, stripe, ebony F1 animals were recovered as recombinants.

**Figure S1. PCR analysis of *CG8533* deletions.** PCR was performed on male recombinant strains 1D and 2D using a primer located within the *CG8533* P element and primer -4000 or -6000 (see text Figure 1). The DNA products generated are shown relative to the lambda *Hind* III digested size standards (the location of the 564 and 2322 lambda *Hind* III bands is shown at the right hand margin). Lanes labeled 1D show recombinant line 1D with the P element (P) to -4000 and P element to -6000 primers respectively. Lanes labeled 2D are similarly depicted. Arrows indicate the primary product of the amplification reaction in each lane. Note that the primary products differ in size between the -4000 and -6000 primer lanes by the expected 2 Kb distance due to the locations of these genomic primers. A second minor product was consistently noted when using the -4000 primer (arrowhead) and was determined to be an unrelated DNA product generated by homology with the -4000 primer and the 98E region of chromosome 3R.
